# Supplementary material
Source: publisher figshare collection journal article supplement (https://gsapubs.figshare.com/ndownloader/files/23318111)
Supplement: Supplementary file 1 [file 23318111]

Quick, L., Sinclair, H.D., Attal, M., and Singh, V., 2019, Conglomerate recycling in the Himalayan foreland basin: Implications for grain size and provenance: GSA Bulletin, <https://doi.org/10.1130/B35334.1>.

## Data Repository

FIGURE A1. Pebble lithologies (including Lower-Middle Siwalik sandstone) documented on exposed gravel bars along the (A) Mohand, (B) Karnali and (C) Kosi rivers. Distances are relative to the mountain front, so negative distances are upstream of the mountain front.

Figure A2. (A) Relationship between isoperimetric ratio (IR) and axes ratio for quartzite pebbles in the Mohand, Karnali and Kosi rivers. Red line represents theoretical maximum IR as a function of the axis ratio. (B) Relationship between our newly defined normalized isoperimetric ratio ( $IR_{norm}$ ) and axis ratio for the three rivers.  $IR_{norm}$  isolates the roundness component from the elongation component: perfectly rounded pebbles are characterised by  $IR_{norm} = 1$  irrelevant of their axis ratio. (C) Relationship between  $IR_{norm}$  and quartzite pebble size (b-axis): there is no correlation between pebble size and roundness.

TABLE A1. Sample localities along the Mohand River.

TABLE A2. Sample localities along the Karnali River.

TABLE A3. Sample localities along the Kosi River.

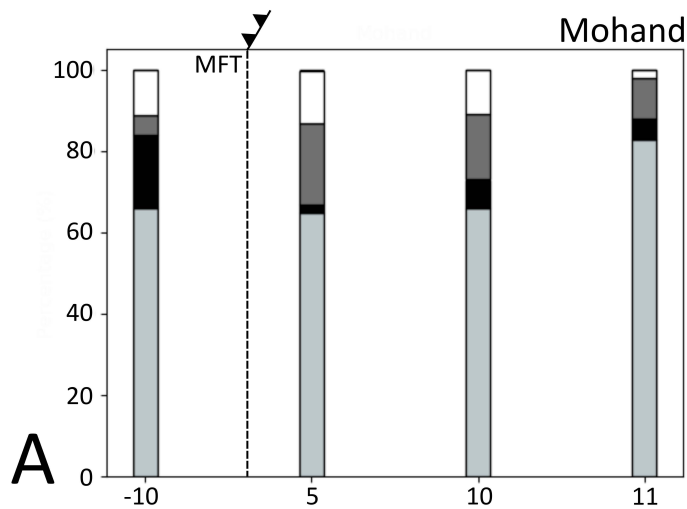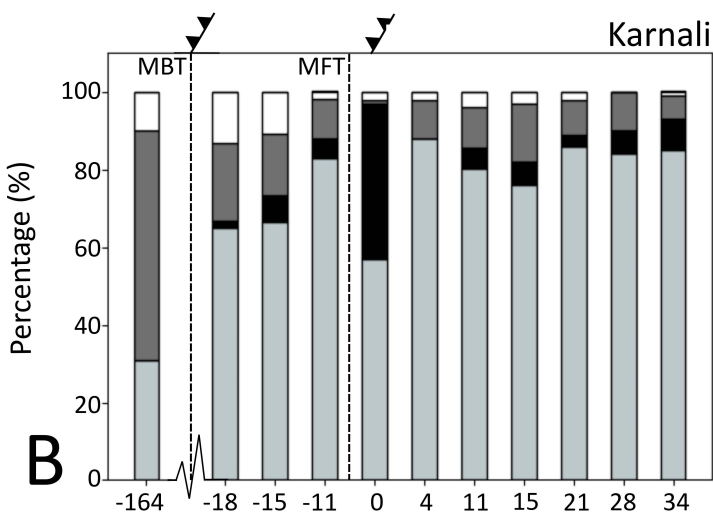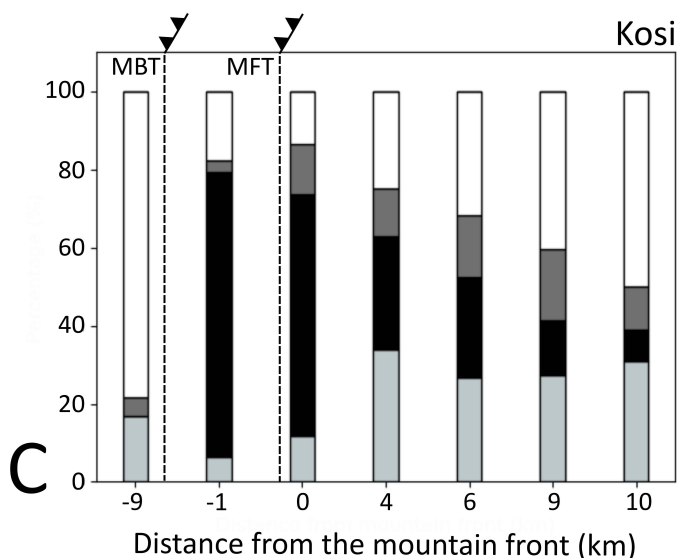

Mohand

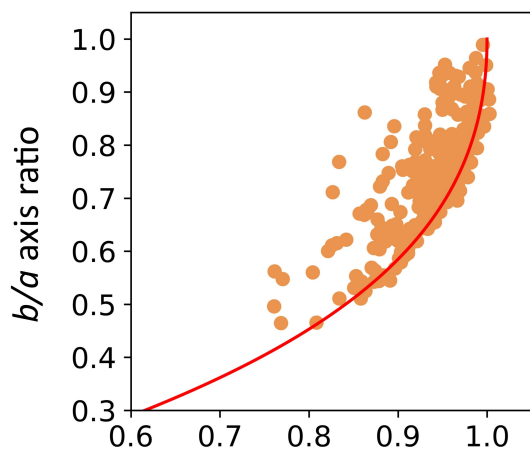

Karnali

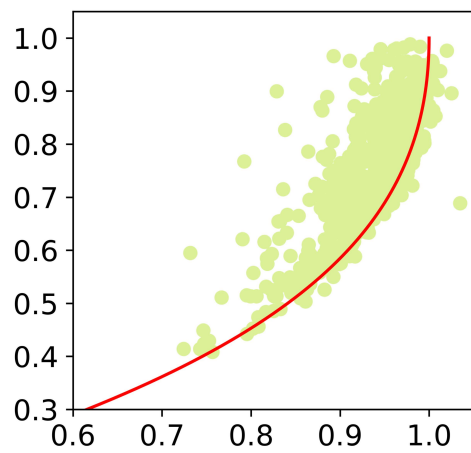

Kosi

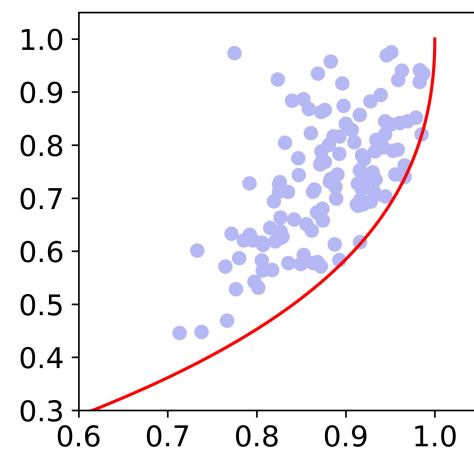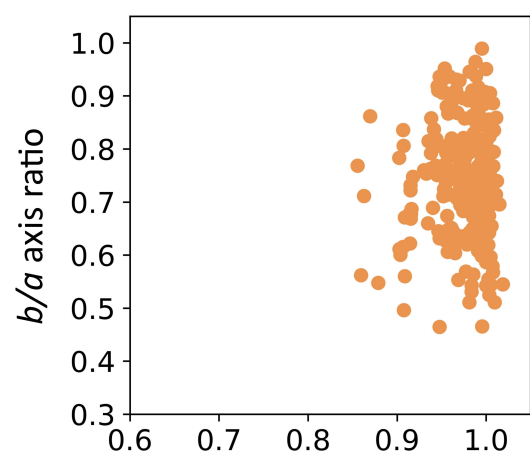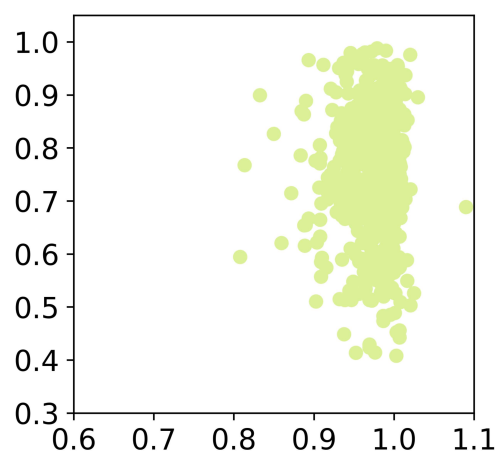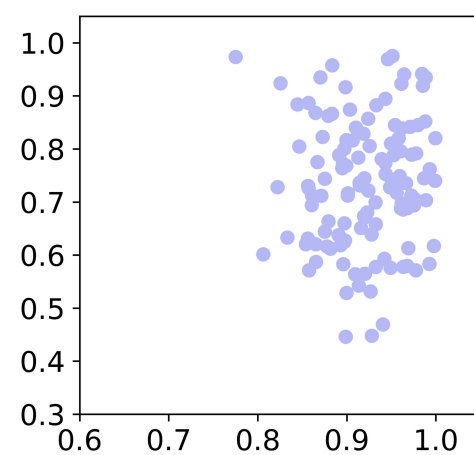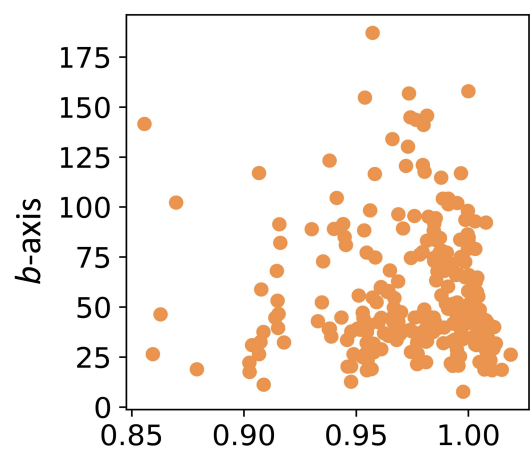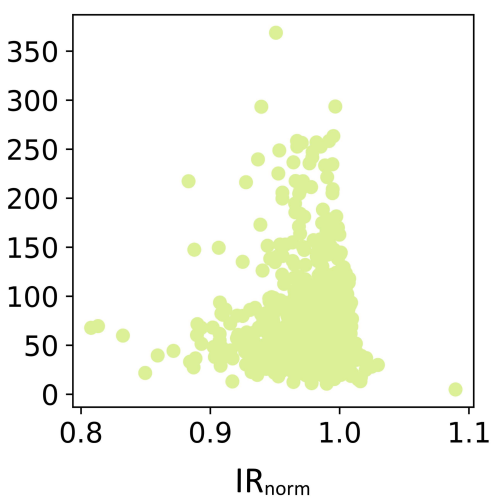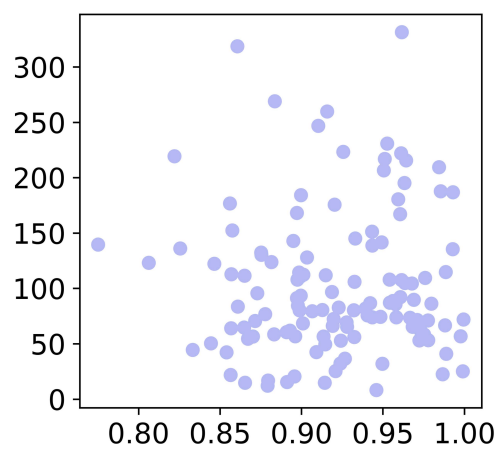

TABLE A1. SAMPLE LOCALITIES ALONG THE MOHAND RIVER

| Sample       | Data type                                             | Latitude<br>(°N) | Longitude<br>(°E) | Location details                                      |
|--------------|-------------------------------------------------------|------------------|-------------------|-------------------------------------------------------|
| Gravel bar   | Lithology, grain size (surface)                       | 30.235996        | 77.950150         | Within Siwalik conglomerate ~10 km upstream of MFT    |
| Gravel bar   | Grain size (surface)                                  | 30.217695        | 77.933832         | Within Siwalik conglomerate ~7 km upstream of MFT     |
| Gravel bar   | Grain size (surface)                                  | 30.197842        | 77.914565         | Within Middle Siwalik sandstone ~3 km upstream of MFT |
| Gravel bar   | Grain size (surface)                                  | 30.175600        | 77.902492         | Mountain front (MFT) Near Mohand town                 |
| Gravel bar   | Lithology, grain size (surface and subsurface), shape | 30.141309        | 77.876064         | ~5 km downstream of MFT                               |
| Gravel bar   | Lithology, grain size (surface and subsurface), shape | 30.104132        | 77.862792         | ~10 downstream of MFT                                 |
| Gravel bar   | Lithology, grain size (surface and subsurface), shape | 30.091881        | 77.854739         | ~11 km downstream of MFT Near Telpura Bridge          |
| Gravel bar   | Grain size (surface)                                  | 30.074881        | 77.843810         | ~13 km downstream of MFT                              |
| Conglomerate | Lithology, grain size                                 | 30.235996        | 77.950150         | Within Siwalik conglomerate ~10 km upstream of MFT    |

TABLE A2. SAMPLE LOCALITIES ALONG THE KARNALI RIVER

| Sample       | Data type                                             | Latitude<br>(°N) | Longitude<br>(°E) | Location details                                                      |
|--------------|-------------------------------------------------------|------------------|-------------------|-----------------------------------------------------------------------|
| Gravel bar   | Lithology, grain size (surface), shape                | 28.776703        | 81.580164         | Above the MBT ~164 km upstream of the MFT                             |
| Gravel bar   | Lithology, grain size (surface), shape                | 28.756816        | 81.253327         | Within Siwalik conglomerate ~18 km upstream of the MFT                |
| Gravel bar   | Lithology, grain size (surface), shape                | 28.736067        | 81.262164         | Within Siwalik conglomerate ~15 km upstream of the MFT                |
| Gravel bar   | Lithology, grain size (surface)                       | 28.724044        | 81.274211         | Within Siwalik conglomerate Near Kuine bridge, ~11 km upstream of MFT |
| Gravel bar   | Lithology, grain size (surface), shape                | 28.631691        | 81.277637         | Mountain front (MFT) Near Chisopani bridge                            |
| Gravel bar   | Lithology, grain size (surface), shape                | 28.599792        | 81.259463         | Bifurcation ~4 km downstream of MFT                                   |
| Gravel bar   | Lithology, grain size (surface), shape                | 28.569004        | 81.205424         | ~11 km downstream of MFT                                              |
| Gravel bar   | Lithology, grain size (surface and subsurface), shape | 28.544683        | 81.186374         | ~15 km downstream of MFT                                              |
| Gravel bar   | Lithology, grain size (surface and subsurface), shape | 28.507501        | 81.161264         | ~21 km downstream of MFT                                              |
| Gravel bar   | Lithology, grain size (surface and subsurface), shape | 28.467970        | 81.111664         | ~28 km downstream of MFT                                              |
| Gravel bar   | Lithology, grain size (surface), shape                | 28.431828        | 81.072190         | Sattighat bridge ~34 km downstream of MFT                             |
| Conglomerate | Lithology, grain size                                 | 28.724044        | 81.274211         | Near Kuine village                                                    |
| Conglomerate | Lithology, grain size                                 | 28.734434        | 81.258173         | ~3 km upstream of Kuine village                                       |

TABLE A3. SAMPLE LOCALITIES ALONG THE KOSI RIVER

| Sample                      | Data type                                             | Latitude<br>(°N) | Longitude<br>(°E) | Location details                                      |
|-----------------------------|-------------------------------------------------------|------------------|-------------------|-------------------------------------------------------|
| Gravel bar                  | Lithology, grain size (surface and subsurface), shape | 26.912110        | 87.158485         | Above the MBT ~9 km upstream of MFT                   |
| Gravel bar                  | Lithology, grain size (surface and subsurface), shape | 26.854028        | 87.151549         | Within Middle Siwalik sandstone ~1 km upstream of MFT |
| Gravel bar                  | Lithology, grain size (surface and subsurface), shape | 26.845011        | 87.149932         | Mountain front (MFT)                                  |
| Gravel bar                  | Lithology, grain size (surface)                       | 26.811187        | 87.153804         | Near Chatara ~4 km downstream of MFT                  |
| Gravel bar                  | Lithology, grain size (surface and subsurface), shape | 26.799139        | 87.145019         | ~6 km downstream of MFT                               |
| Gravel bar                  | Lithology, grain size (surface and subsurface), shape | 26.781528        | 87.124428         | ~9 km downstream of MFT                               |
| Gravel bar                  | Lithology, grain size (surface and subsurface), shape | 26.774337        | 87.126746         | ~10 km downstream of MFT                              |
| Patchy gravel bar/ sand bar | Grain size (surface)                                  | 26.747081        | 87.120260         | ~12 km downstream of MFT                              |
| Patchy gravel bar/ sand bar | Grain size (surface)                                  | 26.726536        | 87.108414         | ~15 km downstream of MFT                              |
